# Supplementary material for: First Molecular Detection of Bartonella bovis and Bartonella schoenbuchensis in European Bison (Bison bonasus)
Source: MDPI journal article supplement (doi:10.3390/ani13010121), 2022-12-28
Supplement: s1 [file s1]

## Article

# First Molecular Detection of *Bartonella Bovis* and *Bartonella Schoenbuchensis* in European Bison (*Bison Bonasus*)

Algimantas Paulauskas, Irma Ražanskė, Indrė Lipatova, Loreta Gričiuvienė, Asta Aleksandravičienė, Artūras Kibiša, Dalia Černevičienė, and Jana Radzijeuskaja

**Table S1.** Detailed PCR protocols for *Bartonella* spp. detection.

| Target                                 | 1 step PCR                                                                                                                                                     | 2 step PCR                                                                                                                                                             | 1 <sup>st</sup> PCR amplification steps                                                    | 2 <sup>nd</sup> PCR amplification steps                                             |
|----------------------------------------|----------------------------------------------------------------------------------------------------------------------------------------------------------------|------------------------------------------------------------------------------------------------------------------------------------------------------------------------|--------------------------------------------------------------------------------------------|-------------------------------------------------------------------------------------|
| <i>ssrA</i> <sup>a</sup>               | 1× SensiMix™ II Probe<br>0.2 µM ssrA-F1 Primer<br>0.2 µM ssrA-R1 Primer<br>0.1 µM ssrA-P1 Probe<br>100 ng DNA                                                  |                                                                                                                                                                        | 95 °C – 10 min<br>95 °C – 20 s<br>50 × 50 °C – 1 min<br>72 °C – 10 s                       |                                                                                     |
| <i>gltA</i> <sup>b</sup>               | 1× DreamTaq Green PCR MM<br>0.4 µM BhCS.781p primer<br>0.4 µM BhCS.1137n primer<br>200 ng DNA                                                                  |                                                                                                                                                                        | 95 °C – 5 min<br>95 °C – 1 min<br>40 × 55 °C – 1 min<br>72 °C – 1 min<br>72 °C – 5 min     |                                                                                     |
| <i>rpoB</i> <sup>b</sup>               | 1× DreamTaq Green PCR MM<br>0.8 µM 1400F primer<br>0.8 µM 2300R primer<br>200 ng DNA                                                                           |                                                                                                                                                                        | 96 °C - 2 min<br>94 °C - 50 s<br>45 × 55 °C - 50 s<br>72 °C - 1 min<br>72 °C - 5 min       |                                                                                     |
| 16 S–23 S rRNA ITS region <sup>c</sup> | 1× Taq Buffer with KCl<br>2.5 mM MgCl <sub>2</sub><br>0.2 mM dNTP Mix<br>1.5 U Taq DNA Polymerase<br>0.4 µM WITS-F primer<br>0.4 µM WITS-R primer<br>200ng DNA | 1× Taq Buffer with KCl<br>2 mM MgCl <sub>2</sub><br>0.2 mM dNTP Mix<br>1.5 U Taq DNA Polymerase<br>0.4 µM Bh311-332F primer<br>0.4 µM ITS-R primer<br>1 µl PCR product | 96 °C - 2 min<br>94 °C - 50 s<br>40 × 48 °C - 50 s<br>72 °C - 1 min 30 s<br>72 °C - 10 min | 96 °C - 2 min<br>94 °C - 45 s<br>45 × 60 °C - 30 s<br>72 °C - 45 s<br>72 °C - 5 min |

<sup>a</sup> Real time PCR <sup>b</sup> Conventional PCR <sup>c</sup> Nested PCR
